# Supplementary material for: Amorphous NiB2for electroreduction of NO to NH3
Source: Royal Society of Chemistry journal article supplement (doi:10.1039/d3ta00394a), 2023-01-01
Supplement: d3ta00394a1.pdf [file d3ta00394a1.pdf]

## Experimental Section

### Synthesis of amorphous NiB<sub>2</sub>

All chemicals were used as received without further purification. Amorphous NiB<sub>2</sub> was prepared by a reflux method with Ar protection[1]. Typically, 2.6 g Ni<sub>2</sub>SO<sub>4</sub>·6H<sub>2</sub>O was dissolved in 20 mL deionized water in three-necked flask. Then, 0.75 g NaBH<sub>4</sub> dissolved in 5 mL deionized water was rapidly added into the reaction flask. After refluxing for 2 h, the precipitates were collected and washed with deionized water/ethanol and then dried under vacuum.

### Electrochemical measurements

Electrochemical measurements were carried out with an electrochemical workstation (CHI-760E Instruments, Shanghai Chenhua Instrument Corp., China). A conventional three-electrode cell was employed with a carbon cloth (CC) sample as working electrode, an Ag/AgCl electrode as reference electrode, and a graphite rod as counter electrode. Before coating catalyst on CC, the CC substrate was pretreated by soaking it in 0.5 M H<sub>2</sub>SO<sub>4</sub> for 12 h, and then washed with deionized water several times and dried at 60 °C for 24 h. All potentials were referenced to reversible hydrogen electrode (RHE) by following equation:  $E_{\text{RHE}}(\text{V}) = E_{\text{Ag/AgCl}} + 0.197 + 0.059 \times \text{pH}$ . The NORR tests were performed using an gastight H-type two-compartment electrochemical cell separated by a Nafion 211 membrane. Before the NORR measurements, all the feeding gases were purified through two glass bubblers containing 4 M KOH solution and the cathodic compartment was purged with Ar for at least 30 min to remove residual oxygen[2]. During each NORR electrolysis, high-purity NO gas (99.9%) was continuously purged into the cathodic chamber at a flow rate of 20 mL min<sup>-1</sup>. After NORR electrolysis at specified potentials for 1 h, the aqueous and gas product are detected by the colorimetric methods and gas chromatography (GC), respectively.

### Determination of NH<sub>3</sub>

The generated NH<sub>3</sub> was determined by the indophenol blue method[3]. Typically, 0.5 mL of electrolyte was removed from the electrochemical reaction vessel and

diluted 10 times with deionized water. Then 2 mL of diluted solution was removed into a clean vessel followed by sequentially adding NaOH solution (2 mL, 1 M) containing salicylic acid (C<sub>7</sub>H<sub>6</sub>O<sub>3</sub>, 5 wt.%) and sodium citrate (C<sub>6</sub>H<sub>5</sub>Na<sub>3</sub>O<sub>7</sub>, 5 wt.%), sodium hypochlorite (NaClO, 1 mL, 0.05 M), and sodium nitroprusside (C<sub>5</sub>FeN<sub>6</sub>Na<sub>2</sub>O, 0.2 mL, 1wt.%) aqueous solution. After the incubation for 2 h at room temperature, the mixed solution was subjected to UV-vis measurement using the absorbance at 655 nm wavelength. The concentration-absorbance curves were calibrated by the standard NH<sub>4</sub>Cl solution with a series of concentrations.

The detailed procedure for colorimetric determination of N<sub>2</sub>H<sub>4</sub> was provided in our previous publications[4].

### Calculations of NH<sub>3</sub> yield rate and NH<sub>3</sub>-Faradaic efficiency

$$\text{NH}_3 \text{ yield rate } (\mu\text{g h}^{-1} \text{ cm}^{-2}) = \frac{c_{\text{NH}_3} \times V}{t \times A} \quad (1)$$

$$\text{NH}_3\text{-Faradaic efficiency } (\%) = \frac{5 \times F \times c_{\text{NH}_3} \times V}{17 \times Q} \times 100\% \quad (2)$$

where  $c_{\text{NH}_3}$  ( $\mu\text{g mL}^{-1}$ ) is the measured NH<sub>3</sub> concentration,  $V$  (mL) is the volume of the electrolyte,  $t$  (h) is the reduction time,  $A$  ( $\text{cm}^{-2}$ ) is the surface area of CC ( $1 \times 1 \text{ cm}^2$ ),  $F$  ( $96500 \text{ C mol}^{-1}$ ) is the Faraday constant,  $Q$  (C) is the quantity of applied electricity.

### Characterizations

X-ray diffraction (XRD) pattern was carried out on a Rigaku D/max 2400 diffractometer. Transmission electron microscopy (TEM), high-resolution transmission electron microscopy (HRTEM), selected area electron diffraction (SAED) and high-angle annular dark-field scanning transmission electron microscopy (HAADF-STEM) were recorded on a Tecnai G<sup>2</sup> F20 microscope. X-ray photoelectron spectroscopy (XPS) analysis was recorded on a PHI 5702 spectrometer. Online differential electrochemical mass spectrometry (DEMS, QAS 100) was performed by QAS 100 spectrometer.

### Calculation details

The Cambridge sequential total energy package (CASTEP) module of the Materials Studio software was conducted for the quantum chemistry calculations. The

Perdew-Burke-Ernzerhof (PBE) generalized gradient approximation (GGA) functional was used for the exchange-correlation potential. The van der Waals interaction was described by using the empirical correction in Grimme's scheme (DFT+D). The convergence criteria for structure optimization were (1) energy tolerance of  $1 \times 10^{-5}$  eV, (2) maximum force tolerance of  $0.02 \text{ eV \AA}^{-1}$ , (3) Monkhorst-Pack k-point sampling:  $3 \times 3 \times 1$ . The electron wave functions were expanded using plane waves with a cutoff energy of 400 eV. NiB<sub>2</sub> (001) was modeled by a  $3 \times 3$  supercell, and a vacuum region of 15 Å was used to separate adjacent slabs. The amorphous NiB<sub>2</sub> was built by relaxing the crystalline NiB<sub>2</sub> (001) at 600 K, and the atomic arrangement could be disordered.

The free energies ( $\Delta G$ , 298 K) for each reaction were given after correction[5]:

$$\Delta G = \Delta E + \Delta ZPE - T\Delta S \quad (3)$$

where  $\Delta E$  is the adsorption energy,  $\Delta ZPE$  is the zero-point energy difference and  $T\Delta S$  is the entropy difference between the gas phase and adsorbed state.

The Forcite module was employed for the MD simulations. The electrolyte system was modeled by a cubic cell with placing catalyst at the center of the cell and randomly filling 1000 H<sub>2</sub>O, 50 NO molecules, and 50 H atoms. After geometry optimization, the MD simulations were performed under the universal field with the total simulation time of 5 ns at a time step of 1 fs.

The radial distribution function (RDF) is calculated by[6]

$$g(r) = \frac{dN}{4\pi\rho r^2 dr} \quad (4)$$

where  $dN$  is the amount of NO in the shell between the central particle  $r$  and  $r+dr$ ,  $\rho$  is the number density of NO, H<sub>2</sub>O, and H.

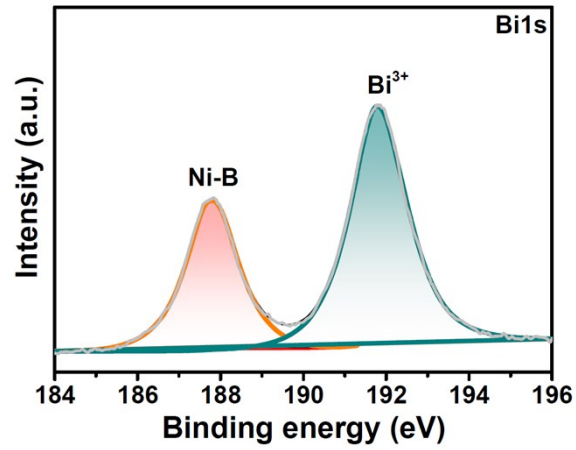

Fig. S1. XPS B1s spectra of NiB<sub>2</sub>.

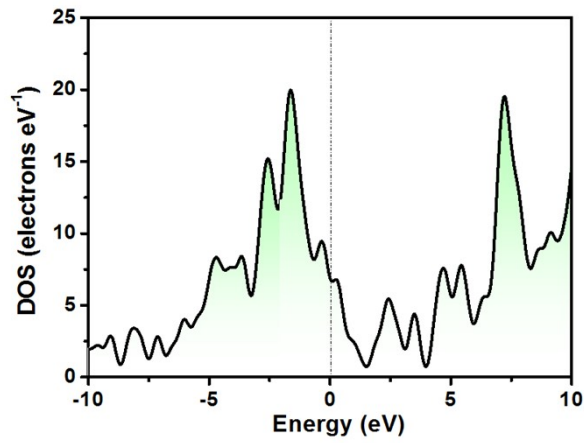

Fig. S2. DOS profile of NiB<sub>2</sub>.

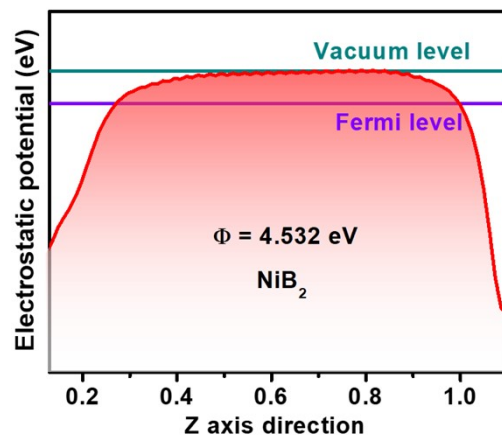

Fig. S3. Average potential profiles along c-axis direction for calculating the work function of NiB<sub>2</sub>.

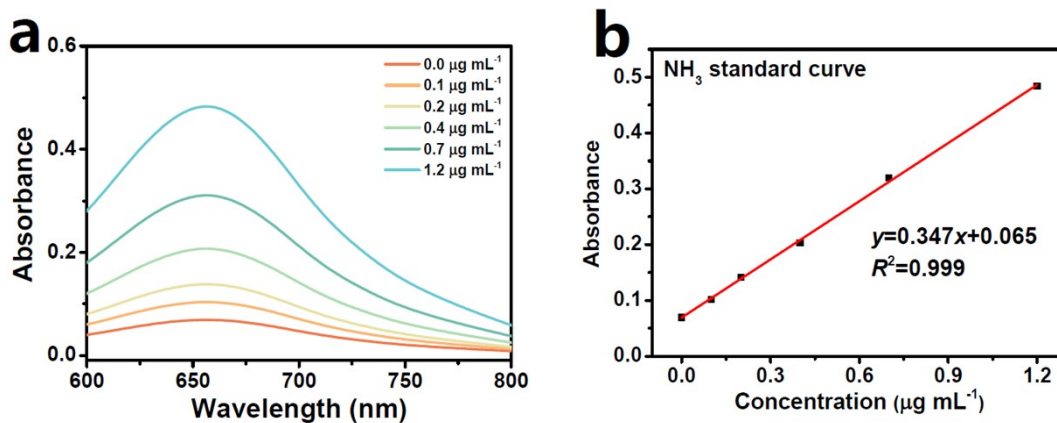

Fig. S4. (a) UV-vis absorption spectra of  $\text{NH}_4^+$  assays after incubated for 2 h at ambient conditions. (b) Calibration curve used for the calculation of  $\text{NH}_3$  concentrations.

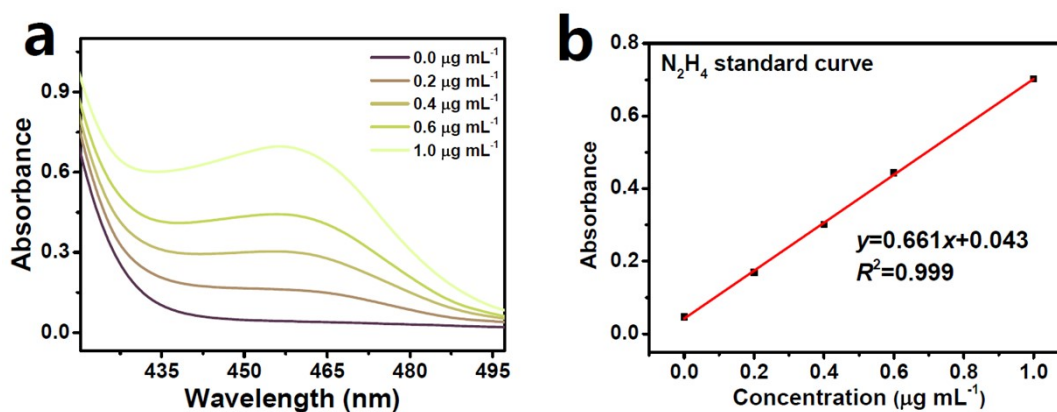

Fig. S5. (a) UV-vis absorption spectra of  $\text{N}_2\text{H}_4$  assays after incubated for 20 min at ambient conditions. (b) Calibration curve used for calculation of  $\text{N}_2\text{H}_4$  concentrations.

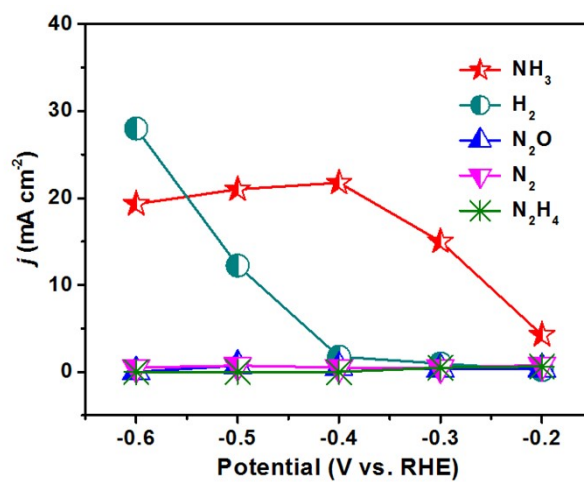

Fig. S6. Partial current densities of various products over NiB<sub>2</sub> after 1 h of NORR electrolysis at different potentials.

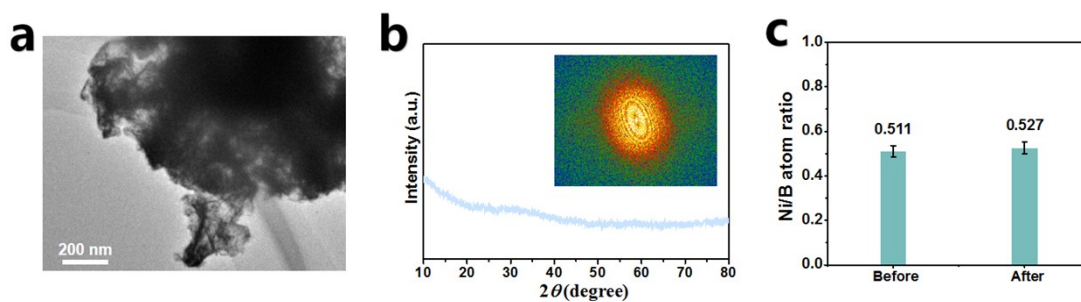

Fig. S7. (a) TEM image, (b) XRD pattern (inset: FFT pattern) and (c) Ni/B atom ratio of NiB<sub>2</sub> after stability tests.

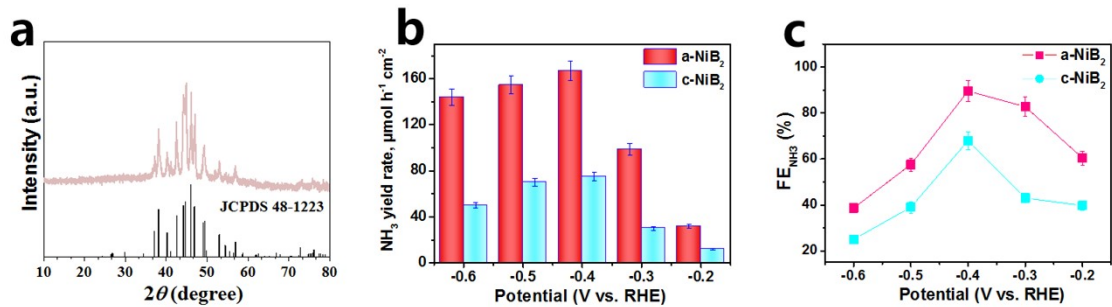

Fig. S8. (a) XRD pattern of crystalline NiB<sub>2</sub> (c-NiB<sub>2</sub>). (b) NH<sub>3</sub> yield rates and (c) FE<sub>NH<sub>3</sub></sub> of c-NiB<sub>2</sub> and a-NiB<sub>2</sub>.

The crystalline NiB<sub>2</sub> (c-NiB<sub>2</sub>) is prepared by directly annealing amorphous NiB<sub>2</sub> (a-NiB<sub>2</sub>) in Ar. The XRD pattern (Fig. S8a) shows the clear crystalline structure of c-NiB<sub>2</sub>. Impressively, the NORR performance of c-NiB<sub>2</sub> is much inferior to that of a-NiB<sub>2</sub> in terms of both NH<sub>3</sub> yield rate (Fig. S8b) and FE<sub>NH<sub>3</sub></sub> (Fig. S8c), and the main cause for their performance disparity arises from their difference in electrochemical surface areas (ECSA), where a-NiB<sub>2</sub> exhibits a much higher ECSA than c-NiB<sub>2</sub> (Fig. S9).

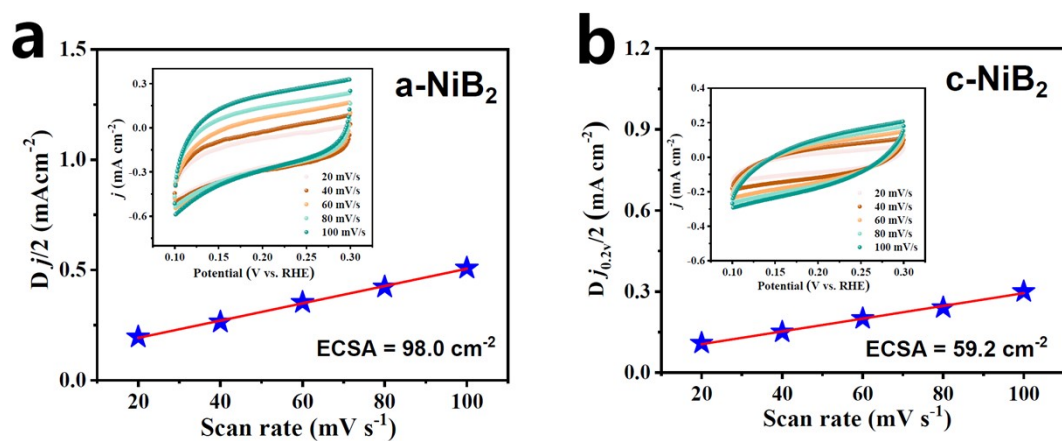

Fig. S9. CV measurements for determining the ECSA of (a) a-NiB<sub>2</sub> and (b) c-NiB<sub>2</sub>.

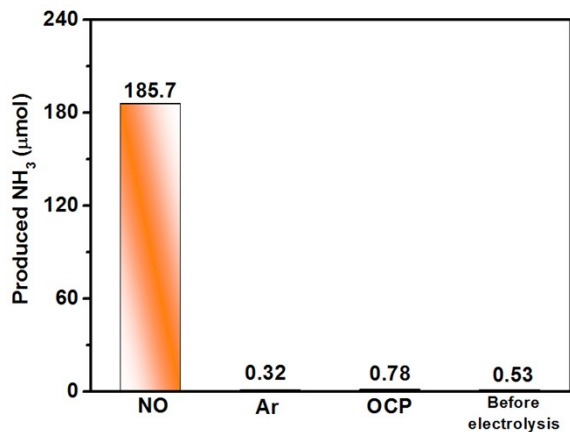

Fig. S10. Amounts of produced NH<sub>3</sub> on NiB<sub>2</sub> under different conditions at -0.4 V.

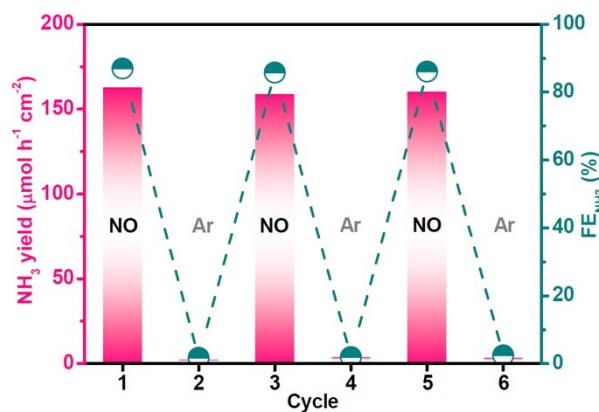

Fig. S11. Switching Ar/NO cycling tests on NiB<sub>2</sub> at -0.4 V.

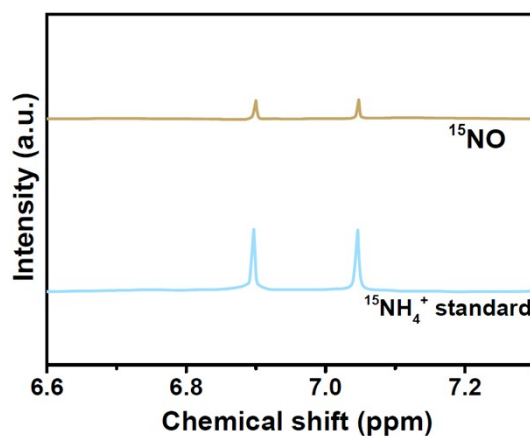

Fig. S12. <sup>1</sup>H NMR spectra of <sup>15</sup>NH<sub>4</sub><sup>+</sup> standard sample and those fed by <sup>15</sup>NO and Ar after NORR electrolysis on NiB<sub>2</sub> at -0.4 V.



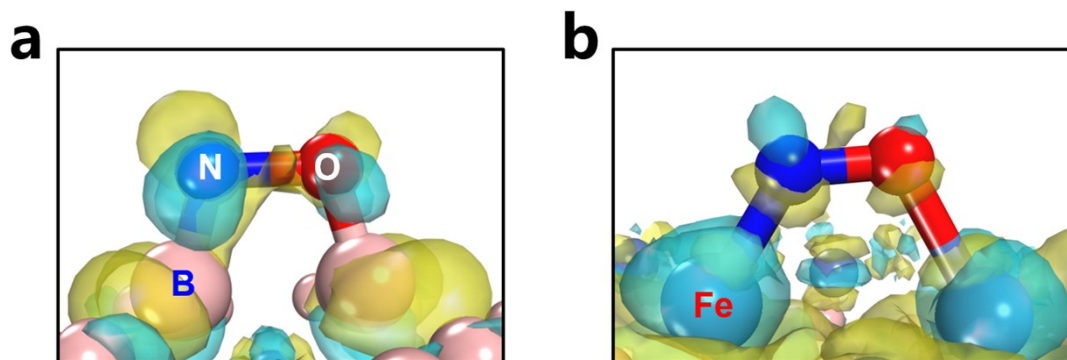

Fig. S13. Charge density differences of adsorbed NO on (a) B and (b) Ni sites of  $\text{NiB}_2$  (Yellow: accumulation, cyan: depletion).

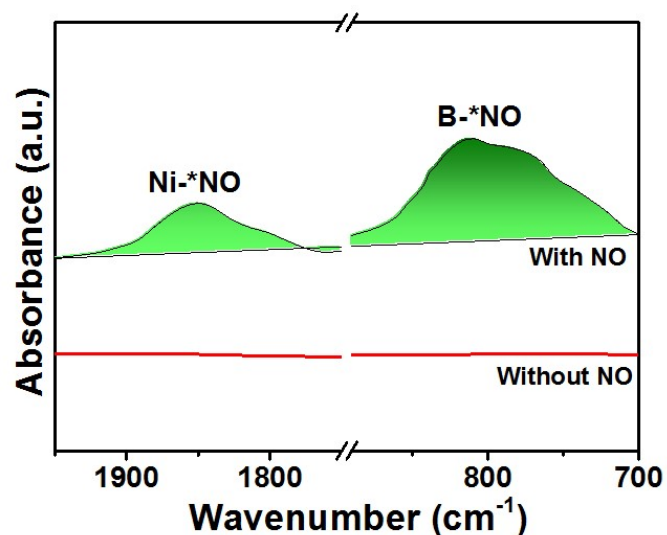

Fig. S14. FTIR spectra of  $\text{NiB}_2$  with and without NO adsorption.

We perform FTIR measurement to experimentally investigate the NO adsorption behavior of  $\text{NiB}_2$ . It is seen that upon the adsorption of NO, the FTIR spectra show two distinct infrared peaks, where  $\sim 1850 \text{ cm}^{-1}$  is assigned to NO adsorption on Ni species ( $\text{Ni-*NO}$ )[7], and  $\sim 800 \text{ cm}^{-1}$  corresponds to  $\text{B-*NO}$ [8]. Obviously, the  $\text{B-*NO}$  peak area is much larger than  $\text{Ni-*NO}$  area, suggesting the stronger NO adsorption on B sites of  $\text{NiB}_2$ .

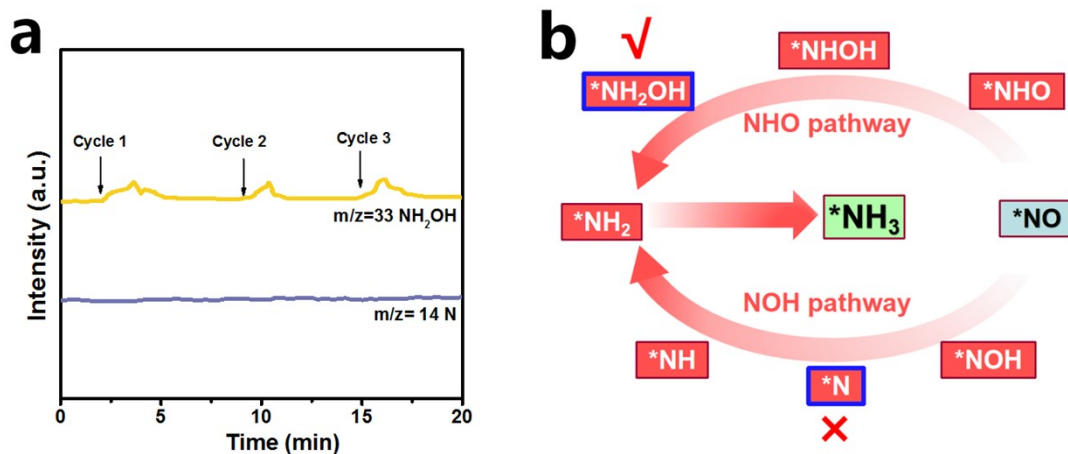

Fig. S15. (a) Online DEMS spectra of NiB<sub>2</sub> during the NORR electrolysis. (b) Schematic of two typical NORR pathways.

The online DEMS data (Fig. S15a) reveal an obvious sign of NH<sub>2</sub>OH intermediate (m/z=33) but no detection of N intermediate (m/z=14), implying that NiB<sub>2</sub> prefers to adopt a NHO pathway (\*NO → \*NHO → \*NHOH → \*NH<sub>2</sub>OH → \*NH<sub>2</sub> → \*NH<sub>3</sub>) rather than NOH pathway (\*NO → \*NOH → \*N → \*NH → \*NH<sub>2</sub> → \*NH<sub>3</sub>) to drive the NORR process[9], as illustrated in Fig. S15b.

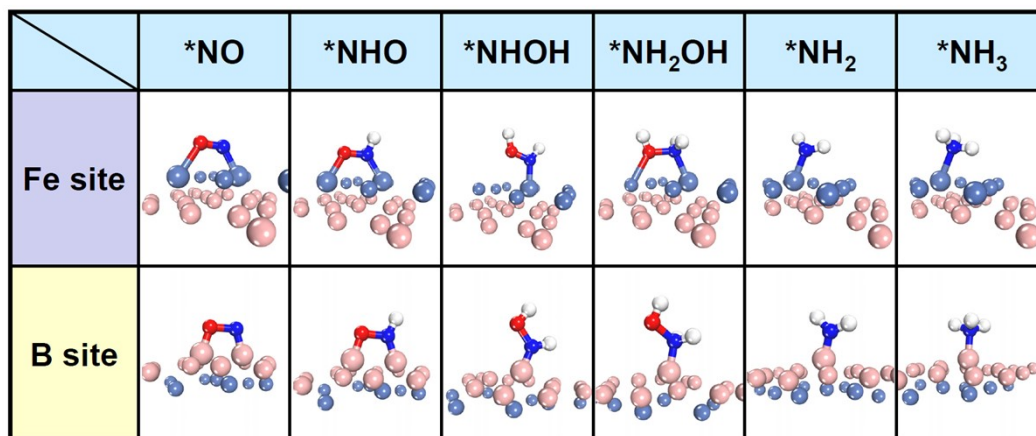

Fig. S16. Optimized structures of NORR intermediates on B and Ni sites of NiB<sub>2</sub>.

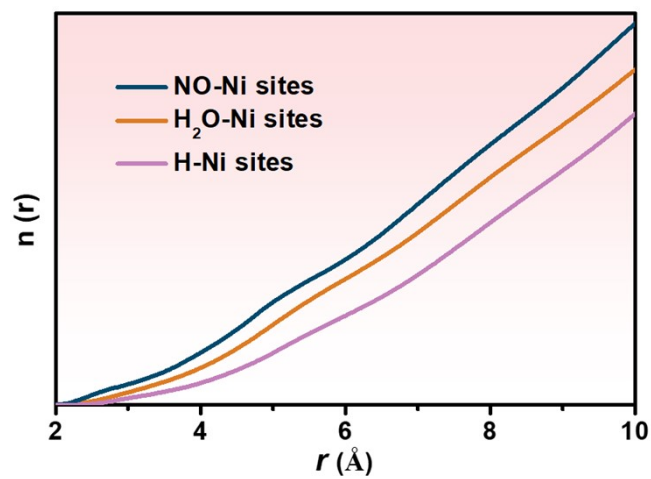

Fig. S17. Integrated RDF curves of \*NO, \*H<sub>2</sub>O, and \*H on Ni sites of NiB<sub>2</sub>.

Table S1. Comparison of the optimum NH<sub>3</sub> yield and NH<sub>3</sub>-Faradic efficiency (FE<sub>NH3</sub>) for recently reported state-of-the-art NORR electrocatalysts at ambient conditions.

| Catalyst                                           | Electrolyte                               | NH <sub>3</sub> yield rate (μmol h <sup>-1</sup> cm <sup>-2</sup> ) | FE <sub>NH3</sub> (%) | Potential (V vs. RHE) | Ref.             |
|----------------------------------------------------|-------------------------------------------|---------------------------------------------------------------------|-----------------------|-----------------------|------------------|
| Mo <sub>2</sub> C                                  | 0.5 M Na <sub>2</sub> SO <sub>4</sub>     | 122.7                                                               | 86.3                  | -0.4                  | [10]             |
| Ni <sub>2</sub> P/CP                               | 0.1 M HCl                                 | 33.47                                                               | 76.9                  | -0.2                  | [11]             |
| Ru <sub>0.05</sub> Cu <sub>0.95</sub>              | 0.05 M Na <sub>2</sub> SO <sub>4</sub>    | 17.68                                                               | 64.9                  | -0.5                  | [12]             |
| Co <sub>1</sub> /MoS <sub>2</sub>                  | 0.5M Na <sub>2</sub> SO <sub>4</sub>      | 217.6                                                               | 87.7                  | -0.5                  | [9]              |
| MoS <sub>2</sub> /GF                               | 0.1 M HCl                                 | 99.6                                                                | 76.6                  | 0.1                   | [13]             |
| NiO/TM                                             | 0.1 M Na <sub>2</sub> SO <sub>4</sub>     | 125.3                                                               | 90                    | -0.6                  | [14]             |
| a-B <sub>2.6</sub> C@TiO <sub>2</sub> /Ti          | 0.1 M Na <sub>2</sub> SO <sub>4</sub>     | 216.4                                                               | 87.6                  | -0.9                  | [15]             |
| FeP/CC                                             | 0.2 M PBS                                 | 85.62                                                               | 88.49                 | -0.2                  | [16]             |
| Bi NDs                                             | 0.1 M Na <sub>2</sub> SO <sub>4</sub>     | 70.2                                                                | 89.2                  | -0.5                  | [17]             |
| CoP/TM                                             | 0.2 M Na <sub>2</sub> SO <sub>4</sub>     | 47.22                                                               | 88.3                  | -0.2                  | [18]             |
| CoS <sub>1-x</sub>                                 | 0.2 M Na <sub>2</sub> SO <sub>4</sub>     | 44.67                                                               | 53.62                 | -0.4                  | [19]             |
| HCNF                                               | 0.2 M Na <sub>2</sub> SO <sub>4</sub>     | 22.35                                                               | 88.33                 | -0.6                  | [20]             |
| Cu <sub>2</sub> O@CoMN <sub>2</sub> O <sub>4</sub> | 0.1 M Na <sub>2</sub> SO <sub>4</sub>     | 94.18                                                               | 75.05                 | -0.9                  | [21]             |
| MoC/NCS                                            | 0.1 M HCl                                 | 79.4                                                                | 89                    | -0.8                  | [22]             |
| <b>NiB<sub>2</sub></b>                             | <b>0.5 M Na<sub>2</sub>SO<sub>4</sub></b> | <b>167.1</b>                                                        | <b>89.6</b>           | <b>-0.4</b>           | <b>This work</b> |

## Supplementary references

- [1]. J. Wu, M. Hou, Z. Chen, W. Hao, X. Pan, H. Yang, W. Cen, Y. Liu, H. Huang, P. W. Menezes and Z. Kang, *Adv. Mater.*, 2022, **34**, 2202995.
- [2]. L. Zhang, J. Liang, Y. Wang, T. Mou, Y. Lin, L. Yue, T. Li, Q. Liu, Y. Luo, N. Li, B. Tang, Y. Liu, S. Gao, A. A. Alshehri, X. Guo, D. Ma and X. Sun, *Angew. Chem. Int. Edit.*, 2021, **60**, 25263-25268.
- [3]. P. Li, Z. Jin, Z. Fang and G. Yu, *Energy Environ. Sci.*, 2021, **14**, 3522-3531.
- [4]. X. Li, G. Zhang, P. Shen, X. Zhao and K. Chu, *Inorg. Chem. Front.*, 2023, **10**, 280-287.
- [5]. B. He, P. Lv, D. Wu, X. Li, R. Zhu, K. Chu, D. Ma and Y. Jia, *J. Mater. Chem. A*, 2022, **10**, 18690-18700.
- [6]. K. Chu, Y. Luo, P. Shen, X. Li, Q. Li and Y. Guo, *Adv. Energy. Mater.*, 2022, **12**, 2103022.
- [7]. M. Mihaylov and K. Hadjiivanov, *Langmuir*, 2002, **18**, 4376-4383.
- [8]. L. Li, C. Tang, X. Cui, Y. Zheng, X. Wang, H. Xu, S. Zhang, T. Shao, K. Davey and S. Z. Qiao, *Angew. Chem. Int. Edit.*, 2021, **133**, 14250-14256.
- [9]. X. Li, K. Chen, X. Lu, D. Ma and K. Chu, *Chem. Eng. J.*, 2023, **454**, 140333.
- [10]. K. Chen, P. Shen, N. Zhang, D. Ma and K. Chu, *Inorg. Chem.*, 2023, DOI: 10.1021/acs.inorgchem.2c03714.
- [11]. T. Mou, J. Liang, Z. Ma, L. Zhang, Y. Lin, T. Li, Q. Liu, Y. Luo, Y. Liu, S. Gao, H. Zhao, A. M. Asiri, D. Ma and X. Sun, *J. Mater. Chem. A*, 2021, **9**, 24268-24275.
- [12]. J. Shi, C. Wang, R. Yang, F. Chen, N. Meng, Y. Yu and B. Zhang, *Sci. China Chem.*, 2021, **64**, 1493-1497.
- [13]. L. Zhang, J. Liang, Y. Wang, T. Mou, Y. Lin, L. Yue, T. Li, Q. Liu, Y. Luo, N. Li, B. Tang, Y. Liu, S. Gao, A. A. Alshehri, X. Guo, D. Ma and X. Sun, *Angew. Chem. Int. Ed.*, 2021, **133**, 25467-25472.
- [14]. P. Liu, J. Liang, J. Wang, L. Zhang, J. Li, L. Yue, Y. Ren, T. Li, Y. Luo, N. Li, B. Tang, Q. Liu, A. M. Asiri, Q. Kong and X. Sun, *Chem. Commun.*, 2021, **57**, 13562-13565.
- [15]. J. Liang, P. Liu, Q. Li, T. Li, L. Yue, Y. Luo, Q. Liu, N. Li, B. Tang, A. A. Alshehri, I. Shakir, P. O. Agboola, C. Sun and X. Sun, *Angew. Chem. Int. Ed.*, 2022, **61**, e202202087.
- [16]. J. Liang, Q. Zhou, T. Mou, H. Chen, L. Yue, Y. Luo, Q. Liu, M. S. Hamdy, A. A. Alshehri, F. Gong and X. Sun, *Nano Res.*, 2022, **15**, 4008-4013.
- [17]. Y. Lin, J. Liang, H. Li, L. Zhang, T. Mou, T. Li, L. Yue, Y. Ji, Q. Liu, Y. Luo, N. Li, B. Tang, Q. Wu, M. S. Hamdy, D. Ma and X. Sun, *Mater. Today Phys.*, 2022, **22**.
- [18]. J. Liang, W.-F. Hu, B. Song, T. Mou, L. Zhang, Y. Luo, Q. Liu, A. A. Alshehri, M. S. Hamdy, L.-M. Yang and X. Sun, *Inorg. Chem. Front.*, 2022, **9**, 1366-1372.
- [19]. L. Zhang, Q. Zhou, J. Liang, L. Yue, T. Li, Y. Luo, Q. Liu, N. Li, B. Tang, F. Gong, X. Guo and X. Sun, *Inorg. Chem.*, 2022, **61**, 8096-8102.
- [20]. L. Ouyang, Q. Zhou, J. Liang, L. Zhang, L. Yue, Z. Li, J. Li, Y. Luo, Q. Liu, N. Li, B. Tang, A. Ali Alshehri, F. Gong and X. Sun, *J. Colloid Interf. Sci.*, 2022, **616**, 261-267.
- [21]. C. Bai, S. Fan, X. Li, Z. Niu, J. Wang, Z. Liu and D. Zhang, *Adv. Funct. Mater.*, 2022, **32**, 2205569.
- [22]. G. Meng, M. Jin, T. Wei, Q. Liu, S. Zhang, X. Peng, J. Luo and X. Liu, *Nano Res.*, 2022, **15**, 8890-8896.
